# Supplementary material for: Evidence for magnesium–phosphorus synergism and co-limitation of grain yield in wheat agriculture
Source: PubMed Central journal article supplement (PMC8079383; doi:10.1038/s41598-021-88588-8), 2021-04-27

**Supplement to:**

**Evidence for magnesium-phosphorus synergism and co-limitation of grain yield in wheat agriculture**

Martin Weih, Hui Liu, Tino Colombi, Thomas Keller, Ortrud Jäck, Pernilla Vallenback, Anna Westerbergh

**Supplement S1. Linear Mixed Model analysis results** for fixed effects of year (2018, 2019,  $df = 1$ ), treatment (compacted and non-compacted soil,  $df = 1$ ), variety ( $df = 8$ ), block ( $df = 3$ ), and the interactions between year, treatment and variety; and random effect of mainplot ( $df = 7$ ) on various traits assessed for nine wheat varieties field-grown in Sweden. **F** critical value for F-statistics, **P** significance (significant:  $P < .050$  underlined), **df** degrees of freedom. Mainplot was included as a random effect to account for the varieties having been assigned to different plot positions in the two years

| Trait               | Year (Y) |             | Treatment (T) |             | Variety (V) |             | Block |             | Y x T |             | Y x V |             | T x V |      | Y x T x V |             |
|---------------------|----------|-------------|---------------|-------------|-------------|-------------|-------|-------------|-------|-------------|-------|-------------|-------|------|-----------|-------------|
|                     | F        | P           | F             | P           | F           | P           | F     | P           | F     | P           | F     | P           | F     | P    | F         | P           |
| G <sub>B</sub>      | 25.31    | <u>.000</u> | 13.90         | <u>.034</u> | 13.77       | <u>.000</u> | .87   | .543        | 5.35  | <u>.023</u> | .63   | .752        | .98   | .453 | 1.13      | .353        |
| G <sub>Y</sub>      | 102.19   | <u>.000</u> | 3.81          | .146        | 38.09       | <u>.000</u> | 11.04 | <u>.040</u> | 9.56  | <u>.003</u> | 4.68  | <u>.000</u> | .96   | .474 | .76       | .642        |
| G <sub>no</sub>     | 118.23   | <u>.000</u> | 11.05         | <u>.044</u> | 11.34       | <u>.000</u> | .80   | .571        | 6.90  | <u>.010</u> | .91   | .515        | 1.06  | .396 | 1.21      | .298        |
| R <sub>no</sub>     | 43.67    | <u>.000</u> | 3.60          | .154        | 21.36       | <u>.000</u> | .65   | .636        | .62   | .434        | .703  | .689        | .48   | .867 | 1.12      | .359        |
| R <sub>a</sub>      | 62.94    | <u>.000</u> | 6.23          | .088        | 3.95        | <u>.000</u> | .24   | .865        | .00   | .991        | 1.00  | .444        | .74   | .657 | .58       | .792        |
| E <sub>N,g</sub>    | 98.10    | <u>.000</u> | 1.76          | .276        | 5.58        | <u>.000</u> | 1.83  | .316        | 20.81 | <u>.000</u> | 1.36  | .222        | .41   | .913 | 1.88      | .072        |
| C <sub>N,g</sub>    | 873.8    | <u>.000</u> | 6.20          | .089        | 75.31       | <u>.000</u> | .69   | .616        | .73   | .395        | 9.17  | <u>.000</u> | .80   | .604 | .99       | .448        |
| NC <sub>till</sub>  | 250.31   | <u>.000</u> | 27.90         | <u>.013</u> | 8.36        | <u>.000</u> | 5.27  | .103        | .26   | .610        | 1.33  | .237        | .31   | .963 | .43       | .900        |
| CaC <sub>till</sub> | 19.13    | <u>.000</u> | .80           | .438        | 2.61        | <u>.012</u> | 3.02  | .194        | .15   | .698        | .64   | .747        | 1.05  | .408 | .84       | .567        |
| KC <sub>till</sub>  | 367.06   | <u>.000</u> | 26.27         | <u>.014</u> | 4.81        | <u>.000</u> | .69   | .617        | .00   | .962        | 2.27  | <u>.028</u> | 1.34  | .232 | 1.13      | .350        |
| MgC <sub>till</sub> | 67.16    | <u>.000</u> | .33           | .605        | 2.74        | <u>.009</u> | 3.12  | .187        | .01   | .908        | .62   | .756        | .83   | .579 | .90       | .521        |
| PC <sub>till</sub>  | 130.47   | <u>.000</u> | 5.12          | .109        | 2.26        | <u>.029</u> | 5.82  | .091        | 10.32 | <u>.002</u> | .76   | .639        | .14   | .997 | .50       | .854        |
| SC <sub>till</sub>  | 2.88     | .093        | 3.17          | .173        | 4.82        | <u>.000</u> | 1.85  | .313        | .75   | .387        | 1.03  | .417        | .36   | .937 | .96       | .469        |
| NC <sub>flow</sub>  | 11.59    | <u>.001</u> | 1.96          | .256        | 4.25        | <u>.000</u> | 1.19  | .444        | 5.83  | <u>.018</u> | 1.34  | .231        | .41   | .914 | .61       | .769        |
| CaC <sub>flow</sub> | 22.74    | <u>.000</u> | 6.50          | .084        | 9.00        | <u>.000</u> | 16.00 | <u>.024</u> | 2.09  | .151        | 1.21  | .301        | 1.07  | .390 | 1.00      | .441        |
| KC <sub>flow</sub>  | 86.40    | <u>.000</u> | 1.16          | .360        | 8.54        | <u>.000</u> | 2.84  | .207        | 2.32  | .131        | 1.56  | .147        | .50   | .852 | 2.09      | <u>.043</u> |
| MgC <sub>flow</sub> | .01      | .921        | 4.71          | .118        | 15.94       | <u>.000</u> | 6.70  | .076        | 6.16  | <u>.015</u> | 1.69  | .110        | .78   | .621 | 1.90      | .068        |
| PC <sub>flow</sub>  | 13.64    | <u>.000</u> | 16.01         | <u>.028</u> | 7.23        | <u>.000</u> | 1.65  | .345        | 17.50 | <u>.000</u> | 1.13  | .348        | .258  | .978 | .849      | .562        |
| SC <sub>flow</sub>  | 2.88     | .093        | 3.17          | .173        | 4.82        | <u>.000</u> | 1.85  | .313        | .75   | .387        | 1.03  | .417        | .36   | .937 | .96       | .469        |

**G<sub>B</sub>** Grains biomass (assessed on 5 indiv. plants), **G<sub>Y</sub>** Agronomic grain yield (assessed on plot basis), **G<sub>no</sub>** Number of grains per plant, **R<sub>no</sub>** Seminal root number, **R<sub>a</sub>** Seminal root angle, **E<sub>N,g</sub>** Grain-specific N efficiency, **C<sub>N,g</sub>** Grain N concentration, **NC** N concentration, **CaC** Calcium concentration, **KC** potassium (K) concentration, **MgC** Magnesium concentration, **PC** Phosphorus concentration, **SC** Sulfur concentration; subscripts **till** tillering (BBCH29) and **flow** flowering (BBCH65) stage

**Supplement S2. Mean ( $\pm 1$  SD,  $n = 8$ ) agronomic grain yields ( $\text{Mg ha}^{-1}$ ) (A) and relationships between the plot-based values of agronomic grain yield and individual-based values of grains biomass ( $\text{g plant}^{-1}$ ) (B) for nine spring wheat varieties field-grown in Sweden during two years (2018, 2019). Linear regressions in B:  $y=2.738x-0.478$ ,  $N = 9$ ,  $R^2 = 0.85$ ,  $P < 0.001$  (2018);  $y=3.221x-0.005$ ,  $N = 9$ ,  $R^2 = 0.69$ ,  $P = 0.006$  (2019). The agronomic yields of the high-yielding varieties reported here (e.g., ‘Alderon’, ‘Happy’) were of a similar magnitude compared to the commercial grain yields for spring wheat achieved in Sweden (means  $2.8$  and  $4.5 \text{ Mg ha}^{-1}$  in 2018 and 2019, respectively; available at [www.scb.se](http://www.scb.se)).**

A

| Variety         | 2018            | 2019            |
|-----------------|-----------------|-----------------|
| ‘Alderon’       | $2.92 \pm 0.36$ | $3.80 \pm 0.40$ |
| ‘Bjarne’        | $1.75 \pm 0.25$ | $2.31 \pm 0.36$ |
| ‘Boett’         | $2.05 \pm 0.25$ | $2.40 \pm 0.50$ |
| ‘Dacke’         | $2.04 \pm 0.23$ | $2.36 \pm 0.43$ |
| ‘Dala landrace’ | $1.51 \pm 0.21$ | $1.86 \pm 0.18$ |
| ‘Diskett’       | $2.21 \pm 0.21$ | $2.27 \pm 0.36$ |
| ‘Happy’         | $2.21 \pm 0.21$ | $2.85 \pm 0.56$ |
| ‘Quarna’        | $1.42 \pm 0.22$ | $2.55 \pm 0.44$ |
| ‘Rohan’         | $2.23 \pm 0.22$ | $2.54 \pm 0.54$ |

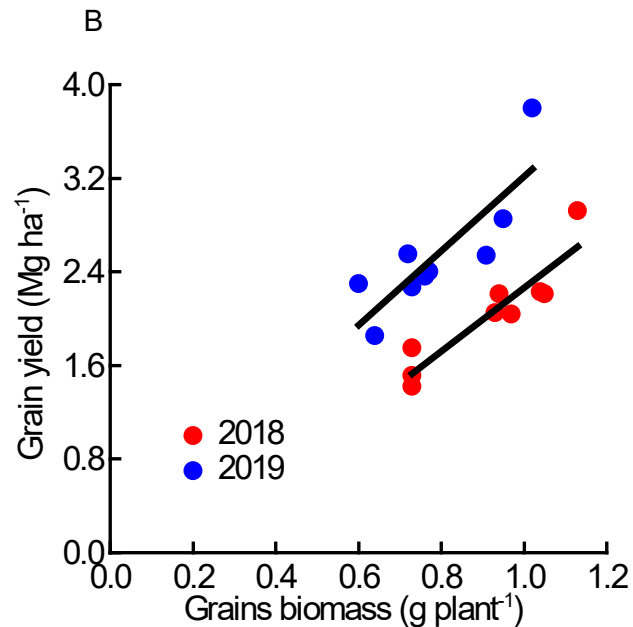

**Supplement S3. Grouping of samples (A) and corresponding variable component loadings (B) according to Principal Components Analysis (PCA).** Samples are attributes (mean trait values) measured on nine wheat varieties field-grown in Sweden during two years (2018 red colors, 2019 blue colors), i.e. the variables shown in (B). Eigenvalues 7.47 for dimension 1 (explanatory power 75 %), and 1.41 for dimension 2 (explanatory power 14 %). Varieties **Ald** 'Alderon', **Bja** 'Bjarne', **Boe** 'Boett', **Dac** 'Dacke', **Dal** 'Dala landrace', **Dis** 'Diskett', **Hap** 'Happy', **Qua** 'Quarna', **Roh** 'Rohan'. Variables: **B<sub>T</sub>** Plant biomass plant<sup>-1</sup> at tillering, **B<sub>G</sub>** Grains biomass plant<sup>-1</sup>, **R<sub>no</sub>** Seminal root number plant<sup>-1</sup>, **R<sub>a</sub>** Seminal root angle, **E<sub>N,g</sub>** Grain-specific nitrogen (N) efficiency, **C<sub>N,g</sub>** Grain N concentration, **P:N<sub>till</sub>** P:N ratio at tillering, **Mg:N<sub>till</sub>** Mg:N ratio at tillering, **\*Mg:P** Mean (tillering and flowering) Mg:P ratio, **\*ScExp** scaling exponent (macroelements) based on data from tillering and flowering; **Year** (supplementary variable).

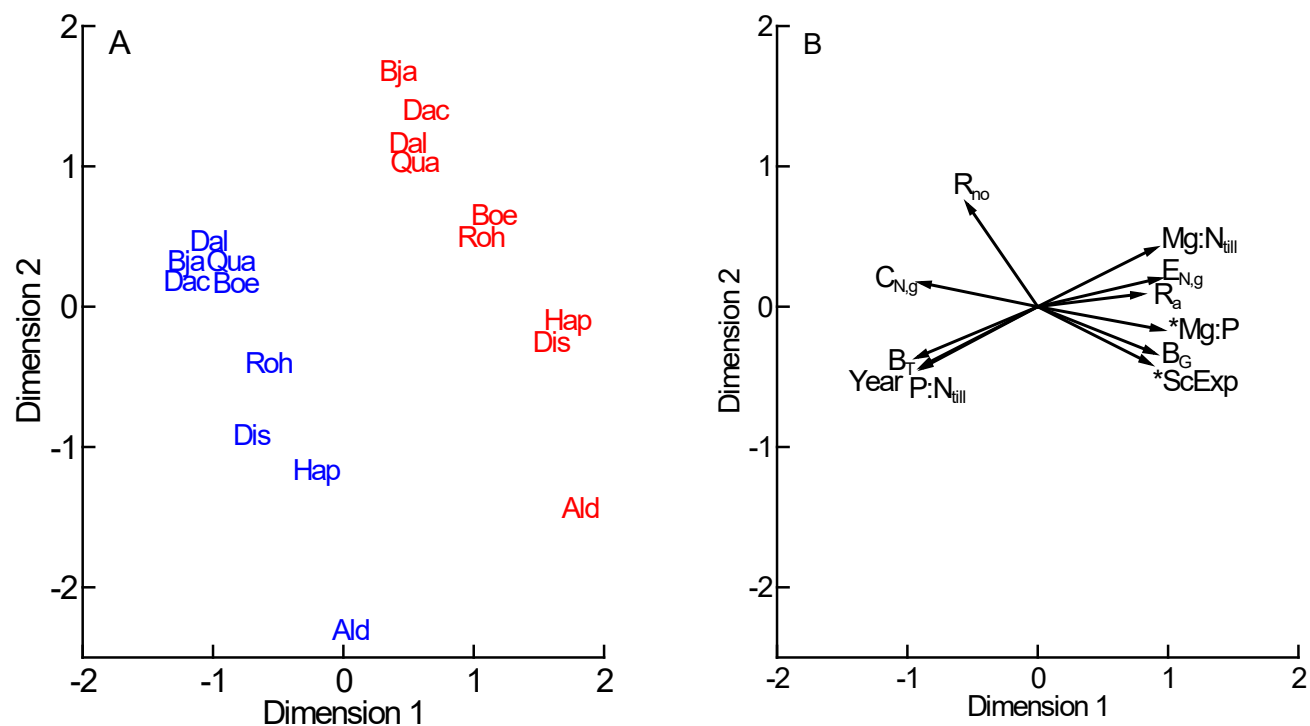

Supplement: 41598_2021_88588_MOESM1_ESM.pdf [file 41598_2021_88588_MOESM1_ESM.pdf]
